# Supplementary material for: A novel copper(ii) complex with a salicylidene carbohydrazide ligand that promotes oxidative stress and apoptosis in triple negative breast cancer cells
Source: Royal Society of Chemistry journal article supplement (doi:10.1039/d4dt01914h), 2024-01-01
Supplement: d4dt01914h1.pdf [file d4dt01914h1.pdf]

## Supplementary Information

### Chemicals

Salicylaldehyde and carbohydrazide and were purchased from Aldrich. Methanol, absolute ethanol (GR), N,N-dimethylformamide (DMF, GR), DMSO, Cu(OAc)<sub>2</sub>(H<sub>2</sub>O), 1,10-phenanthroline monohydrate (GR) were obtained from Merck. Calf thymus DNA was sourced from Sigma.

### Physical measurements

C, H and N analysis were performed on a Perkin-Elmer model 2400 series II CHNS/O analyzer. Mass spectra were recorded on a Xevo-G2 XS QT of mass spectrometer, Waters UHPLC system. Infrared (IR) spectrum was recorded with a Shimadzu IR Affinity - 1 FT-IR spectrometer using KBr pellet. Conductivity measurement was done using a Mettler Toledo dual conductivity/pH meter model SevenMulti equipped with Inlab 730 and Inlab 413 electrodes. Electronic spectra were recorded on a Jasco V-570 UV/VIS/NIR spectrophotometer using a pair of matched quartz cell of path length of 1 cm. Electron paramagnetic resonance spectra were recorded on a JEOL, Japan Model: JES - FA200 ESR spectrometer with X and Q band. Room temperature solution EPR spectra were recorded using an aqueous cell and frozen glass spectra were recorded in liquid nitrogen using a quartz dewer. Fluorescence measurements were done using a Jasco fluorescence spectrophotometer FP-8500. X-ray crystal structure was determined using a Bruker Axs Kappa Apex2 diffractometer. Crystallographic data for the structural analysis has been deposited with the Cambridge Crystallographic Data Center, CCDC number is 2365897 for compound **1**.

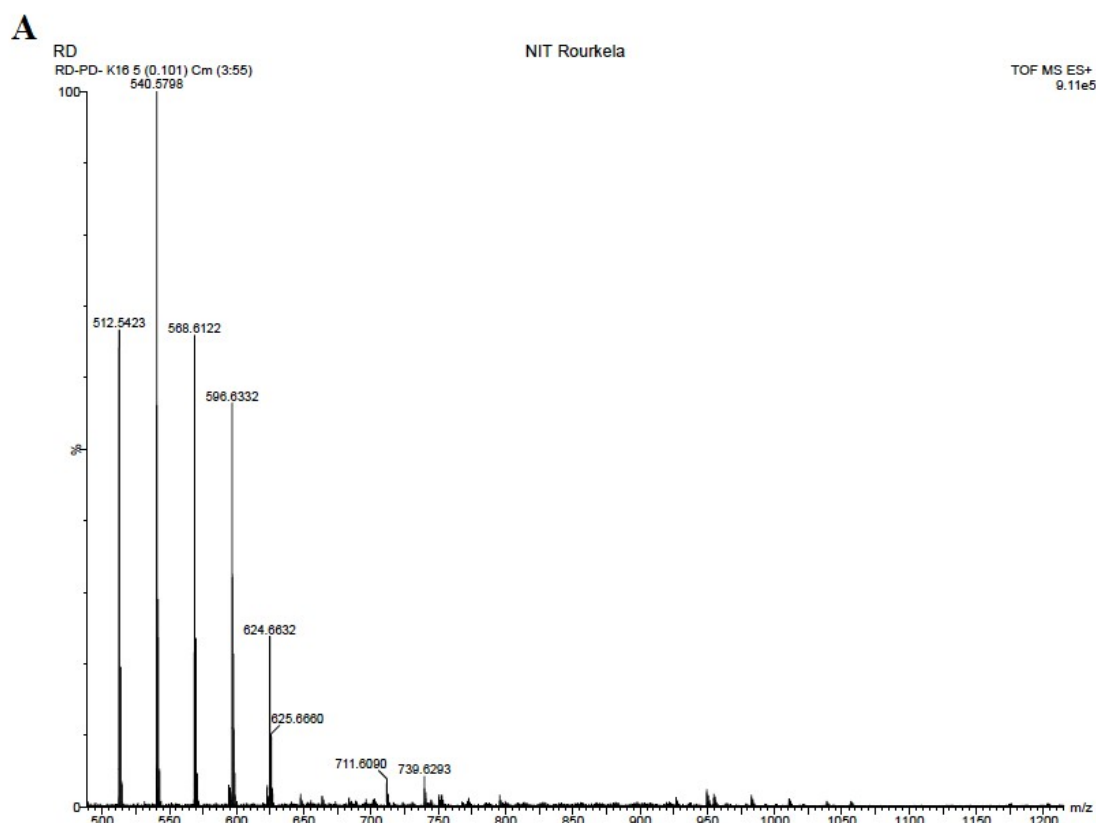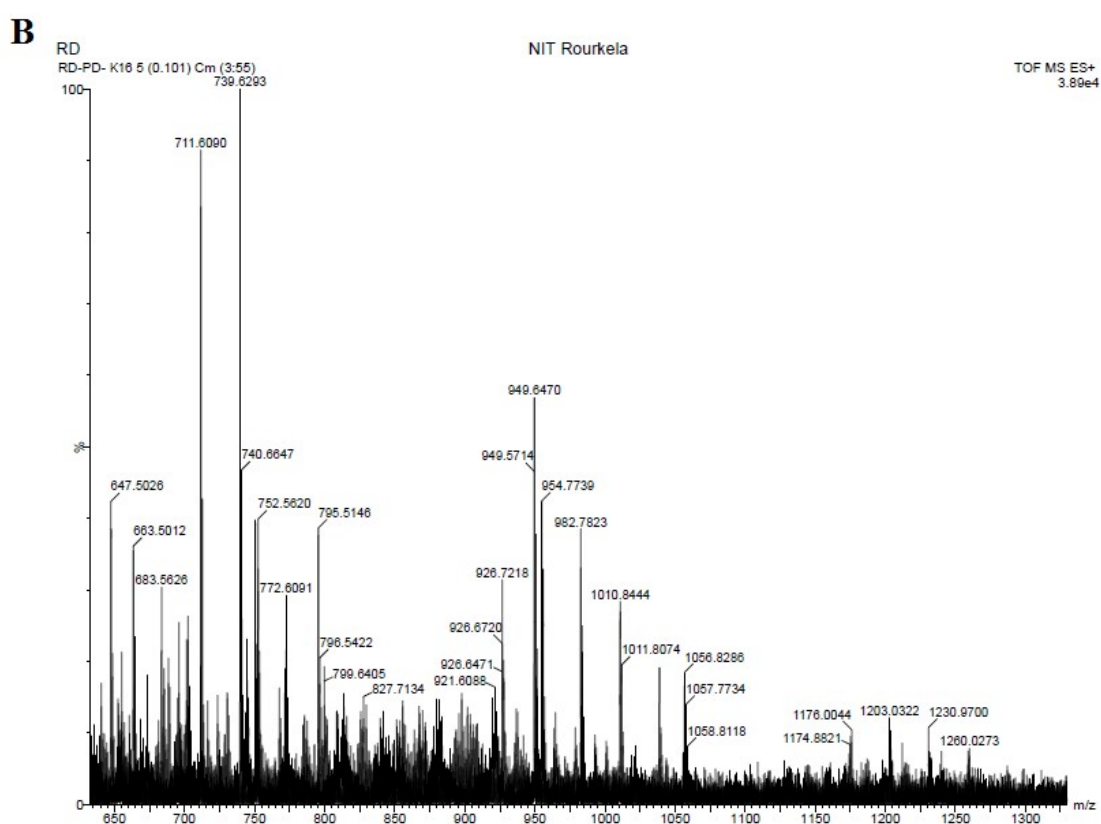

Fig. S1 HR-MS spectra of **1** in CH<sub>3</sub>OH.

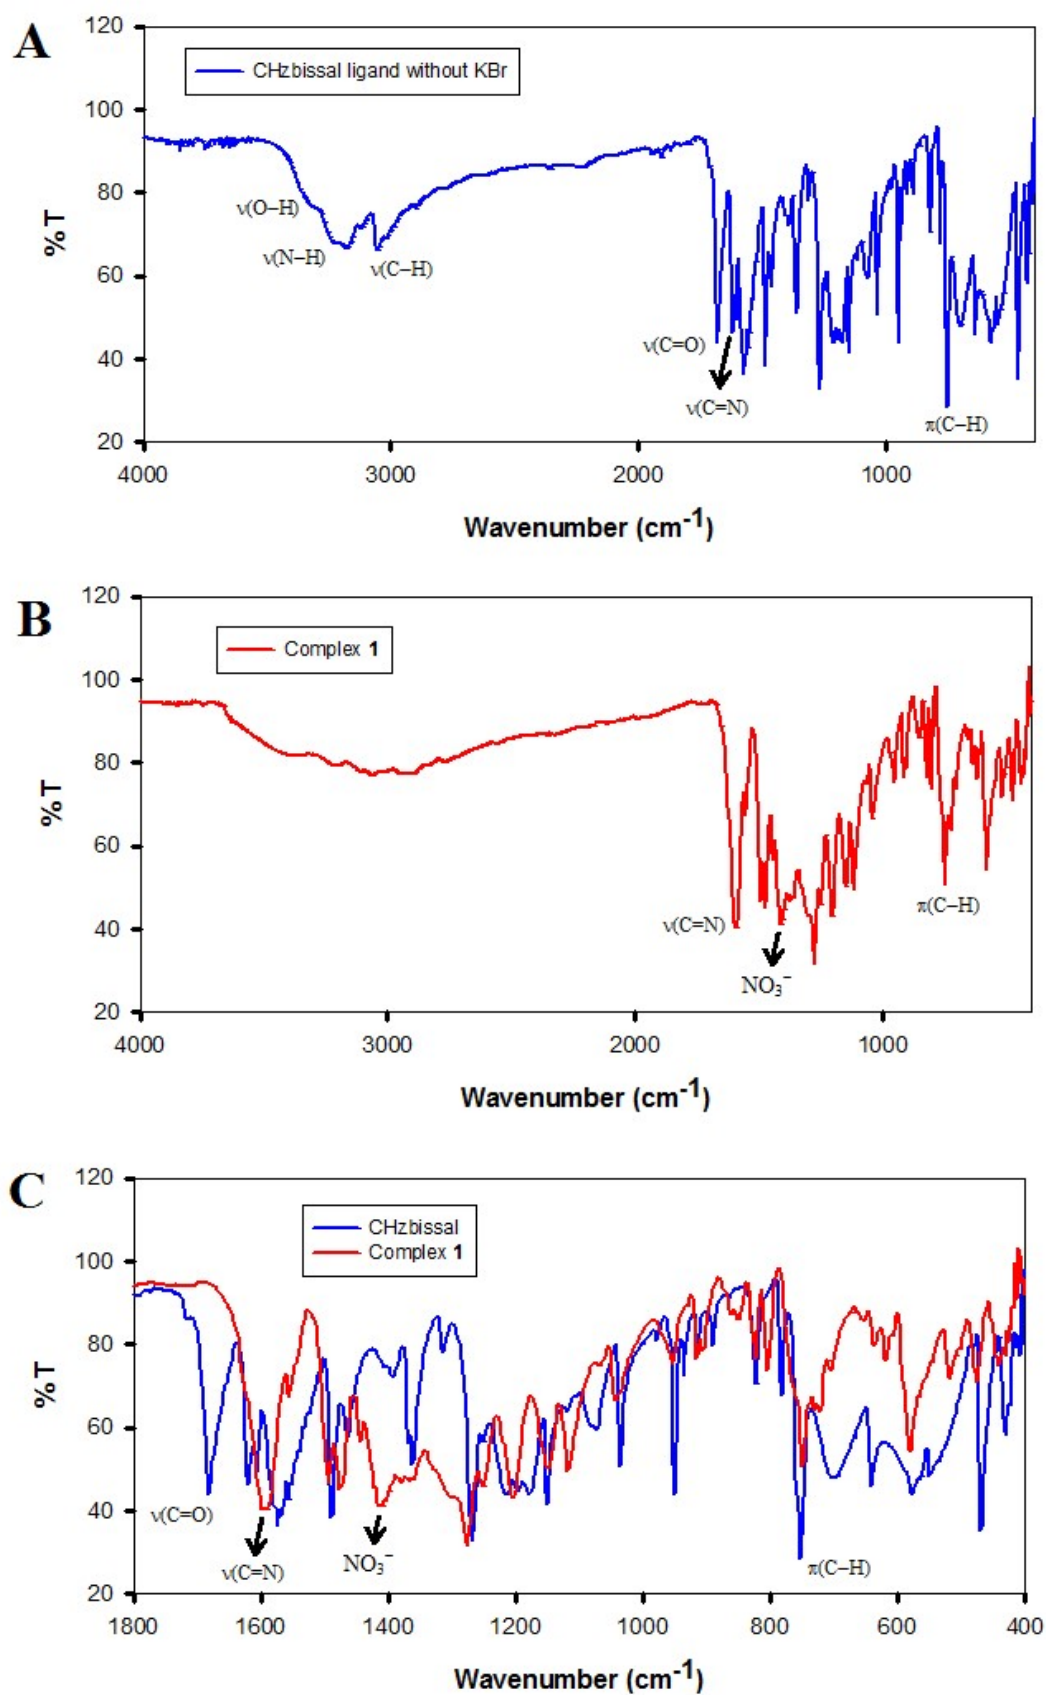

**Fig. S2** IR spectra of (A) Schiff base ligand 1,5-bis(salicylidene)carbohydrazide, (B) **1**, and (C) overlay of Schiff base ligand and **1** in the 1800-400  $\text{cm}^{-1}$  region.

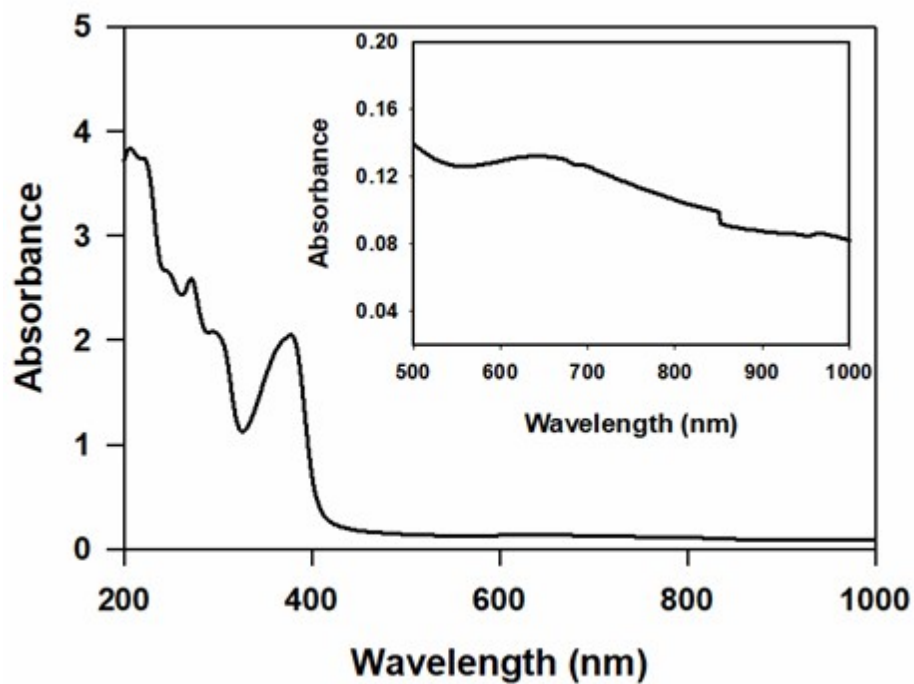

Fig. S3 Electronic spectra of 1 in water.  $[1] = 1.81 \times 10^{-4}$  M.

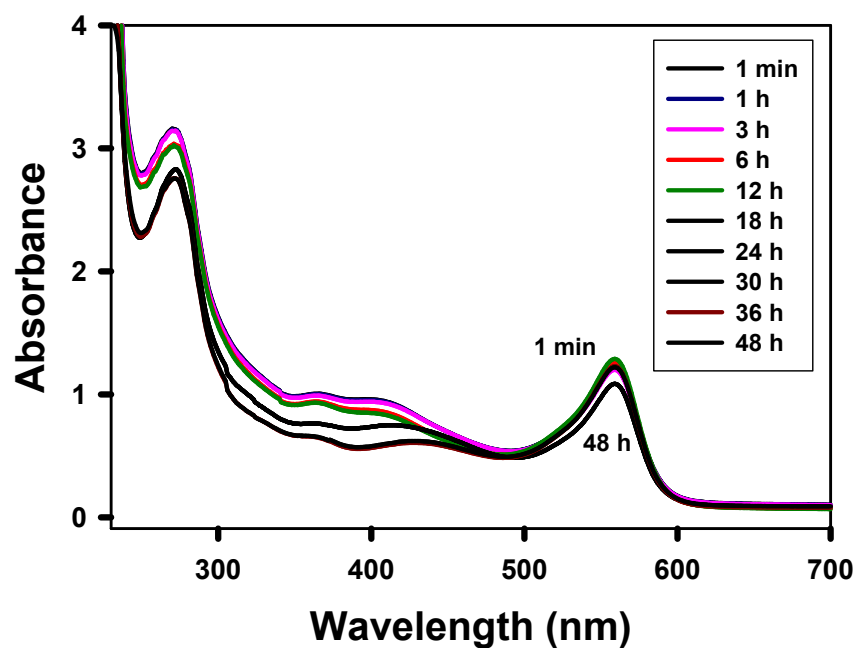

Fig. S4 Electronic spectral change with time to check stability of 1 in DMEM for 48 h.

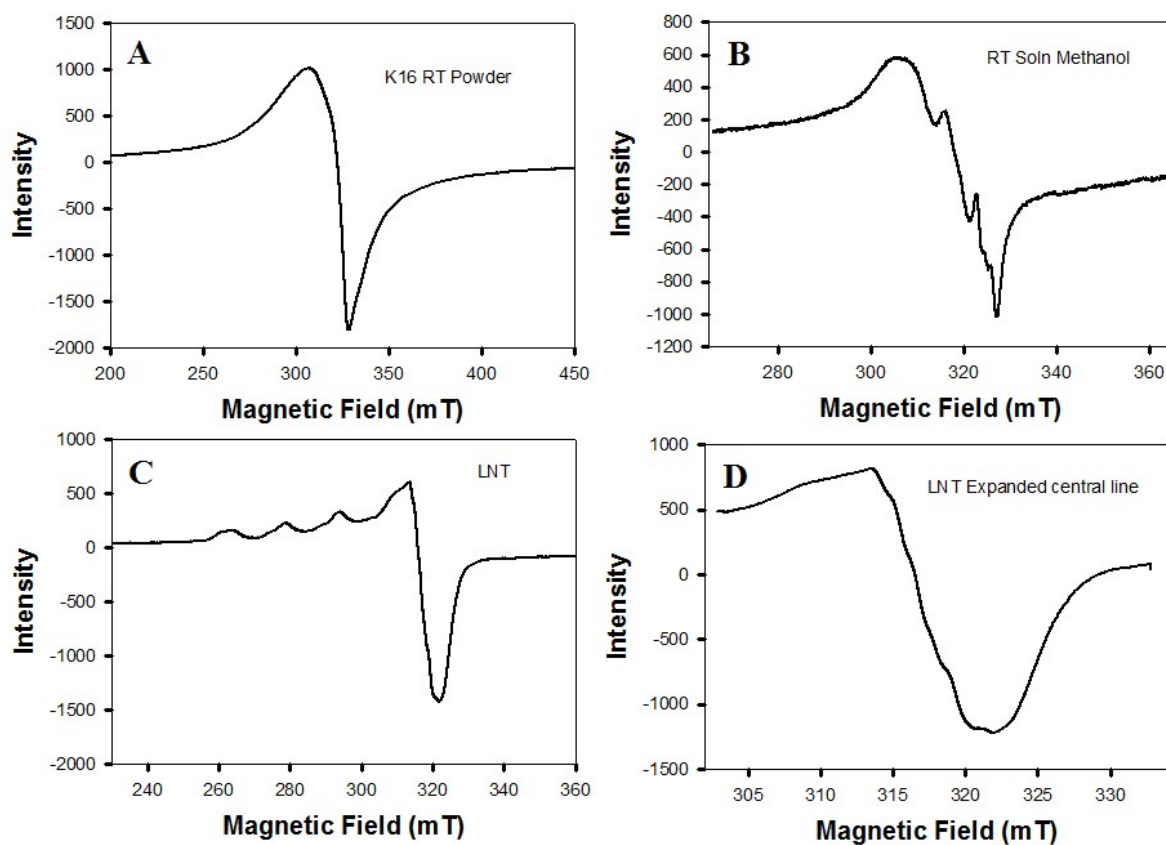

**Fig. S5** X-band EPR spectra of **1**. (A) Powder sample at RT. (B) CH<sub>3</sub>OH solution spectrum at RT. (C) Frozen glass spectrum in CH<sub>3</sub>OH at LNT. (D) Expanded view of the central line of the frozen glass spectrum shown in C.

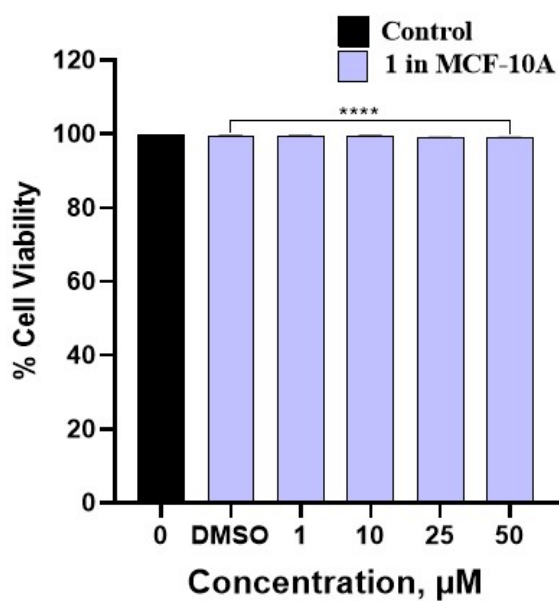

**Fig. S6** Cell viability of MCF-10A cells against **1**.

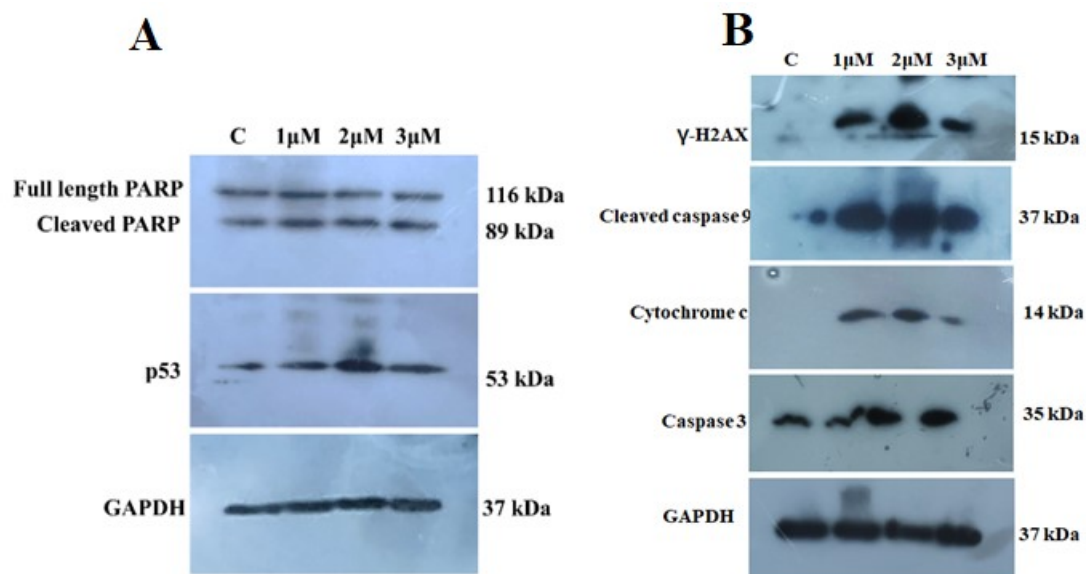

**Fig. S7** Western blot detection of apoptotic protein expression after treatment with complex 1 (1, 2 and 3  $\mu$ M) for 24 h. (A) PARP, p53. (B) Gamma H2AX, cleaved caspase 9, cytochrome c, caspase 3. GAPDH was used as loading control for all.
